# Supplementary material for: Basal Serum Diamine Oxidase Levels as a Biomarker of Histamine Intolerance: A Retrospective Cohort Study
Source: MDPI journal article supplement (doi:10.3390/nu14071513), 2022-04-05
Supplement: s1 [file s1]

**Table S1.** Positive skin test/PATCH test or specific IgE in the study population.

| Features                            | Group 1<br>DAO < 3<br>U/mL<br><i>n</i> = 31 | Group 2<br>DAO 3-10 U/mL<br><i>n</i> = 60 | Group 1 + 2<br>DAO ≤ 10 U/mL<br><i>n</i> = 91 | Group 3<br>DAO > 10<br>U/mL<br><i>n</i> = 55 |
|-------------------------------------|---------------------------------------------|-------------------------------------------|-----------------------------------------------|----------------------------------------------|
| Positive specific IgE: <i>n</i> (%) | 3 (10)                                      | 12 (20)                                   | 14 (15)                                       | 11 (20)                                      |
| Positive SPT: <i>n</i> (%)          | 10 (32)                                     | 24 (40)                                   | 34 (37)                                       | 25 (45)                                      |
| Positive Patch test: <i>n</i> (%)   | 8 (26)                                      | 21 (36)                                   | 29 (32)                                       | 17 (31)                                      |
| Total IgE (IU/mL): median (IQR)     | 43 (8–179)                                  | 145 (53–465)                              | 71 (23–240)                                   | 123 (50–478)                                 |

Abbreviations: IQR = interquartile range; IgE = Immunoglobulin E; DAO = diamine oxidase, SPT = skin prick test.

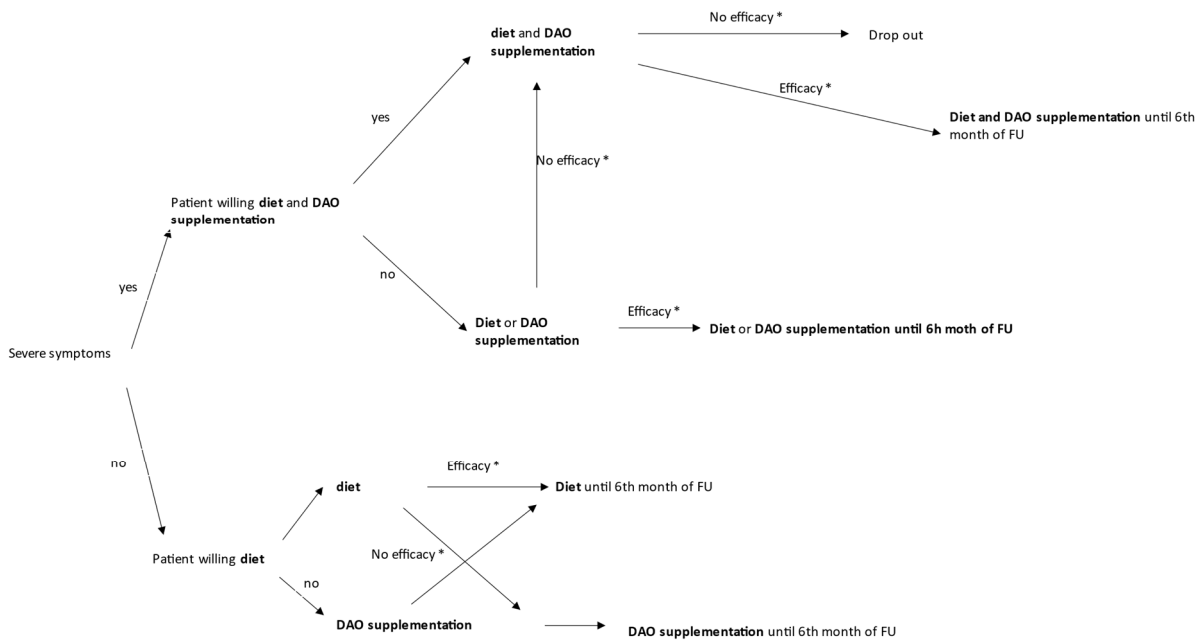

**Figure S1.** Treatment of patients with suspected HIT. Abbreviations: DAO = diamine oxidase; HIT = Histamine intolerance; FU = follow up. Diet: exclusion of histamine-rich food as suggested by literature [4], [25]. DAO supplementation: 1 capsule as needed before meals (max 2 b.i.d). Efficacy\*: the treatment was re-evaluated after one month and in case of non-efficacy (no change of severity score) the following changes were made. Symptoms evaluation according to severity is described in paragraph 2.2.
